# Supplementary material for: Antimicrobial Resistance and Genomic Characterization of Six New Sequence Types in Multidrug-Resistant Pseudomonas aeruginosa Clinical Isolates from Pakistan
Source: MDPI journal article supplement (doi:10.3390/antibiotics10111386), 2021-11-12
Supplement: s1 [file s1]

**Supplementary Table S2.** Non-Synonymous SNPs detected in 73 genes related to antibiotic resistance in six new ST isolates using PAO1 as reference genome.

| Gene locus | Gene name   | Mechanism         | <i>P. aeruginosa</i> strains/number of SNPs |       |       |        |        |        |            |
|------------|-------------|-------------------|---------------------------------------------|-------|-------|--------|--------|--------|------------|
|            |             |                   | PA 64                                       | PA 65 | PA 88 | PA 107 | PA 141 | PA 152 | Total SNPs |
| PA0156     | <i>triA</i> | Antibiotic efflux | 0                                           | 5     | 1     | 0      | 1      | 0      | 7          |
| PA0157     | <i>triB</i> |                   | 0                                           | 0     | 0     | 0      | 2      | 0      | 2          |
| PA0158     | <i>triC</i> |                   | 0                                           | 3     | 1     | 0      | 2      | 0      | 6          |
| PA0424     | <i>mexR</i> |                   | 1                                           | 1     | 2     | 0      | 2      | 0      | 6          |
| PA0425     | <i>mexA</i> |                   | 0                                           | 0     | 0     | 0      | 1      | 0      | 1          |
| PA0426     | <i>mexB</i> |                   | 0                                           | 0     | 1     | 0      | 1      | 0      | 2          |
| PA0427     | <i>oprM</i> |                   | 0                                           | 0     | 1     | 0      | 1      | 0      | 2          |
| PA1236     | <i>farB</i> |                   | 0                                           | 2     | 1     | 0      | 0      | 0      | 3          |
| PA1282     | <i>lrfA</i> |                   | 5                                           | 5     | 7     | 4      | 6      | 4      | 31         |
| PA1316     | <i>lrfA</i> |                   | 3                                           | 4     | 2     | 4      | 3      | 3      | 19         |
| PA1435     | <i>mexM</i> |                   | 4                                           | 3     | 7     | 5      | 7      | 5      | 31         |
| PA1436     | <i>mdtC</i> |                   | 0                                           | 2     | 3     | 2      | 3      | 1      | 11         |
| PA1754     | <i>cysB</i> |                   | 0                                           | 0     | 0     | 0      | 0      | 0      | 0          |
| PA2018     | <i>mexY</i> |                   | 1                                           | 3     | 5     | 1      | 6      | 4      | 20         |
| PA2019     | <i>mexX</i> |                   | 3                                           | 4     | 6     | 3      | 6      | 4      | 26         |
| PA2020     | <i>mexZ</i> |                   | 0                                           | 0     | 2     | 0      | 3      | 0      | 5          |
| PA2389     | <i>pvdR</i> |                   | 1                                           | 1     | 1     | 0      | 1      | 1      | 5          |
| PA2390     | <i>pvdT</i> |                   | 2                                           | 1     | 3     | 2      | 3      | 1      | 5          |
| PA2391     | <i>opmQ</i> |                   | 3                                           | 2     | 5     | 2      | 6      | 2      | 20         |
| PA2491     | <i>mexS</i> |                   | 1                                           | 1     | 7     | 1      | 7      | 1      | 18         |
| PA2492     | <i>mexT</i> |                   | 2                                           | 2     | 4     | 3      | 4      | 3      | 18         |
| PA2493     | <i>mexE</i> |                   | 0                                           | 1     | 0     | 0      | 2      | 0      | 3          |
| PA2494     | <i>mexF</i> |                   | 0                                           | 0     | 1     | 0      | 1      | 0      | 2          |
| PA2495     | <i>oprN</i> |                   | 0                                           | 1     | 3     | 0      | 3      | 0      | 7          |
| PA2525     | <i>adeC</i> |                   | 4                                           | 4     | 4     | 0      | 6      | 1      | 19         |
| PA2526     | <i>muxC</i> |                   | 0                                           | 0     | 2     | 0      | 0      | 0      | 2          |
| PA2527     | <i>muxB</i> |                   | 0                                           | 0     | 0     | 0      | 1      | 0      | 1          |
| PA2528     | <i>muxA</i> |                   | 1                                           | 2     | 1     | 0      | 1      | 0      | 5          |
| PA2837     | <i>opmA</i> |                   | 1                                           | 3     | 5     | 2      | 3      | 3      | 17         |
| PA3019     | <i>taeA</i> |                   | 1                                           | 1     | 4     | 1      | 5      | 2      | 14         |
| PA3137     | <i>farB</i> |                   | 3                                           | 0     | 1     | 1      | 1      | 2      | 8          |
| PA3521     | <i>opmE</i> |                   | 4                                           | 4     | 11    | 3      | 9      | 5      | 36         |
| PA3522     | <i>mexQ</i> |                   | 0                                           | 4     | 2     | 3      | 3      | 2      | 14         |
| PA3523     | <i>mexP</i> |                   | 0                                           | 2     | 5     | 1      | 4      | 1      | 13         |
| PA3574     | <i>nalD</i> |                   | 0                                           | 1     | 2     | 0      | 0      | 1      | 4          |
| PA3676     | <i>mexK</i> |                   | 2                                           | 3     | 8     | 2      | 8      | 1      | 24         |
| PA3677     | <i>mexJ</i> |                   | 2                                           | 3     | 2     | 1      | 3      | 0      | 11         |
| PA3678     | <i>mexL</i> |                   | 1                                           | 2     | 2     | 0      | 2      | 1      | 9          |
| PA3894     | <i>adeC</i> |                   | 0                                           | 2     | 2     | 0      | 2      | 0      | 6          |
| PA4205     | <i>mexG</i> |                   | 0                                           | 0     | 3     | 0      | 3      | 0      | 6          |
| PA4206     | <i>mexH</i> |                   | 2                                           | 2     | 1     | 0      | 1      | 0      | 6          |
| PA4207     | <i>mexI</i> |                   | 1                                           | 1     | 0     | 0      | 0      | 1      | 3          |
| PA4208     | <i>opmD</i> |                   | 3                                           | 3     | 5     | 0      | 5      | 1      | 17         |
| PA4374     | <i>mexV</i> |                   | 1                                           | 2     | 5     | 1      | 4      | 2      | 15         |
| PA4375     | <i>mexW</i> |                   | 2                                           | 1     | 2     | 1      | 3      | 2      | 11         |
| PA4595     | <i>yjrk</i> |                   | 2                                           | 2     | 3     | 2      | 3      | 2      | 14         |
| PA4597     | <i>oprJ</i> |                   | 0                                           | 1     | 6     | 1      | 9      | 2      | 19         |
| PA4598     | <i>mexD</i> |                   | 2                                           | 2     | 12    | 2      | 10     | 1      | 29         |
| PA4599     | <i>mexC</i> |                   | 2                                           | 4     | 9     | 1      | 9      | 2      | 27         |
| PA4600     | <i>nfxB</i> |                   | 0                                           | 0     | 1     | 0      | 2      | 0      | 3          |
| PA4974     | <i>opmH</i> |                   | 1                                           | 7     | 3     | 4      | 5      | 5      | 25         |

|            |                     |                                       |     |     |     |    |     |     |    |
|------------|---------------------|---------------------------------------|-----|-----|-----|----|-----|-----|----|
| PA4990     | <i>emrE</i>         |                                       | 0   | 0   | 1   | 0  | 0   | 0   | 1  |
| PA4997     | <i>msbA</i>         |                                       | 0   | 2   | 3   | 0  | 3   | 0   | 8  |
| PA5158     | <i>adeC</i>         |                                       | 1   | 3   | 5   | 2  | 4   | 0   | 15 |
| PA5160     | <i>farB</i>         |                                       | 3   | 3   | 6   | 3  | 5   | 3   | 23 |
| PA5518     | <i>rosB</i>         |                                       | 2   | 2   | 1   | 0  | 1   | 1   | 7  |
| PA0706     | <i>catB7</i>        |                                       | 4   | 4   | 2   | 1  | 3   | 4   | 18 |
| PA1129     | <i>fosA</i>         |                                       | 0   | 0   | 2   | 0  | 1   | 1   | 4  |
| PA4522     | <i>ampD</i>         |                                       | 0   | 0   | 1   | 2  | 3   | 1   | 7  |
| PA4521     | <i>ampE</i>         |                                       | 2   | 3   | 2   | 1  | 3   | 5   | 16 |
| PA4109     | <i>ampR</i>         | Antibiotic<br>inactivation            | 0   | 3   | 3   | 0  | 2   | 0   | 8  |
| PA4110     | <i>ampC</i>         |                                       | 4   | 5   | 12  | 3  | 12  | 1   | 37 |
| PA3047     | <i>dacB</i>         |                                       | 0   | 0   | 1   | 0  | 1   | 2   | 4  |
| PA4119     | <i>Aph(3')- IIb</i> |                                       | 1   | 0   | 3   | 1  | 3   | 2   | 10 |
| PA5514     | <i>OXA-50</i>       |                                       | 0   | 4   | 3   | 2  | 3   | 2   | 14 |
| PA0004     | <i>gyrB</i>         |                                       | 0   | 0   | 0   | 1  | 0   | 0   | 1  |
| PA0903     | <i>alaS</i>         |                                       | 2   | 0   | 1   | 0  | 1   | 0   | 4  |
| PA1972     | <i>pmrC</i>         |                                       | 2   | 3   | 3   | 2  | 3   | 2   | 15 |
| PA3002     | <i>mfd</i>          |                                       | 1   | 3   | 2   | 0  | 2   | 1   | 9  |
| PA3168     | <i>gyrA</i>         |                                       | 0   | 0   | 1   | 0  | 3   | 0   | 4  |
| PA3946     | <i>rosC</i>         |                                       | 3   | 8   | 33  | 3  | 44  | 1   | 92 |
| PA4265     | <i>tufA</i>         |                                       | 0   | 0   | 0   | 0  | 0   | 0   | 0  |
| PA4277     | <i>tufB</i>         |                                       | 0   | 0   | 0   | 0  | 0   | 0   | 0  |
| PA4560     | <i>ileS</i>         |                                       | 2   | 2   | 4   | 1  | 4   | 1   | 14 |
| PA4964     | <i>parC</i>         | Antibiotic<br>target alter-<br>nation | 0   | 0   | 1   | 0  | 1   | 1   | 3  |
| PA4967     | <i>parE</i>         |                                       | 0   | 1   | 1   | 0  | 1   | 0   | 3  |
| PA3553     | <i>pmrF</i>         |                                       | 0   | 1   | 3   | 0  | 3   | 0   | 7  |
| PA3554     | <i>arnA</i>         |                                       | 3   | 3   | 6   | 1  | 7   | 2   | 22 |
| PA0920     | <i>mprF</i>         |                                       | 2   | 4   | 10  | 0  | 9   | 6   | 31 |
| PA4418     | <i>ftsI</i>         |                                       | 0   | 1   | 0   | 0  | 0   | 0   | 1  |
| PA4419     | <i>ftsI</i>         |                                       | 0   | 0   | 0   | 0  | 0   | 0   | 0  |
| PA0958     | <i>oprD</i>         |                                       | 16  | 8   | 11  | 8  | 11  | 16  | 70 |
| Total SNPs |                     |                                       | 109 | 163 | 285 | 84 | 306 | 118 |    |

**Supplementary Table S3.** List of phages identified in *P. aeruginosa* New sequence types genomes.

| Sr. no. | Strain | Region Length (kb) | Completeness | Most Common Phage             |
|---------|--------|--------------------|--------------|-------------------------------|
| 1.      | PA_64  | 55.2               | Intact       | PHAGE_Pseudo_phi 2            |
|         |        | 14.5               | Intact       | PHAGE_Pseudo_Pf1              |
|         |        | 18.4               | Questionable | PHAGE_Pseudo_phiCT X          |
|         |        | 9.1                | Incomplete   | PHAGE_Escher_500465_1         |
|         |        | 9.7                | Incomplete   | PHAGE_Escher_ESCO5            |
|         |        | 10.9               | Incomplete   | PHAGE_Pseudo_Phi297           |
|         |        | 17.3               | Incomplete   | PHAGE_Pseudo_Phi297           |
|         |        | 8.7                | Incomplete   | PHAGE_Bacilli_G               |
|         |        | 51.1               | Intact       | PHAGE_Pseudo_F10              |
|         |        | 30.6               | Intact       | PHAGE_Pseudo_YMC1 1/02/R656   |
| 2.      | PA_65  | 48.6               | Questionable | PHAGE_Pseudo_F10              |
|         |        | 9.7                | Incomplete   | PHAGE_Escher_phAPE C8         |
|         |        | 9.1                | Incomplete   | PHAGE_Escher_500465_1         |
|         |        | 13.3               | Incomplete   | PHAGE_Shigel_sf11             |
|         |        | 25.7               | Incomplete   | PHAGE_klebsi_ST147_VIM1Phi7.1 |
|         |        | 7.7                | Incomplete   | PHAGE_Gor-don_Schwabeltier    |
|         |        | 15.5               | Incomplete   | PHAGE_Haemop_Aaphi 23         |
|         |        |                    | Incomplete   | PHAGE_Pseudp_YMC1 1/02/R656   |
|         |        |                    | Incomplete   | PHAGE_Escher_500465_1         |
|         |        | 54.9               | Intact       | PHAGE-Pseudo-phi2             |
| 3.      | PA_88  | 28.9               | Intact       | PHAGE_Pseudo_YMC1 1/02/R656   |
|         |        | 16.4               | Questionable | PHAGE_Pseudo_Pf1              |
|         |        | 9.1                | Incomplete   | PHAGE_Escher_500465_1         |
|         |        | 9.7                | Incomplete   | PHAGE_Escher_ESCO5            |
|         |        | 14.5               | Intact       | PHAGE_Pseudo_Haemo p_Aaphi23  |
|         |        | 18.4               | Questionable | PHAGE-Pseudo-Dobby            |
|         |        | 23.1               | Incomplete   | PHAGE_Pseudo_pqO              |
|         |        | 36.2               | Intact       | PHAGE_Pseudo_F10              |
|         |        | 18.4               | Questionable | PHAGE_Pseudo_Dobby            |
|         |        | 8.7                | Incomplete   | PHAGE_Bacilli_G               |
| 4.      | PA_107 |                    |              |                               |
|         |        |                    |              |                               |
|         |        |                    |              |                               |
|         |        |                    |              |                               |
|         |        |                    |              |                               |
|         |        |                    |              |                               |
|         |        |                    |              |                               |
|         |        |                    |              |                               |
|         |        |                    |              |                               |
|         |        |                    |              |                               |
| 5.      | PA_141 |                    |              |                               |
|         |        |                    |              |                               |
|         |        |                    |              |                               |
|         |        |                    |              |                               |
|         |        |                    |              |                               |
|         |        |                    |              |                               |
|         |        |                    |              |                               |
|         |        |                    |              |                               |
|         |        |                    |              |                               |
|         |        |                    |              |                               |
| 6.      | PA_152 |                    |              |                               |
|         |        |                    |              |                               |
|         |        |                    |              |                               |
|         |        |                    |              |                               |
|         |        |                    |              |                               |
|         |        |                    |              |                               |
|         |        |                    |              |                               |
|         |        |                    |              |                               |
|         |        |                    |              |                               |
|         |        |                    |              |                               |

Intact (score > 90), Questionable (score 70-90), Incomplete (score < 70).

**Supplementary Table S4.** Core, Accessory and unique genes characteristics of the new sequence type isolates compared to the *P. aeruginosa* reference strains.

| Strain     | No. of core genes | No. of accessory genes | No. of unique genes | No. of exclusively absent genes |
|------------|-------------------|------------------------|---------------------|---------------------------------|
| PA_64      | 5065              | 1810                   | 48                  | 2                               |
| PA_65      | 5065              | 1879                   | 25                  | 0                               |
| PA_88      | 5065              | 1747                   | 36                  | 3                               |
| PA_107     | 5065              | 1695                   | 18                  | 1                               |
| PA_141     | 5065              | 1687                   | 127                 | 7                               |
| PA_152     | 5065              | 1816                   | 11                  | 2                               |
| PAO1       | 5065              | 1755                   | 0                   | 0                               |
| UCBPP-PA14 | 5065              | 1972                   | 1                   | 0                               |

**Supplementary Table S5.** Susceptibility Profile antibiotic panel with Cut-off points for *Pseudomonas* species following CLSI guidelines.

| <b>Carbapenemase Inactivation</b>     | <b>Zone Size</b> | <b>Pos<br/>≤ 8</b> | <b>Inderterminate<br/>9 - 14</b> | <b>Neg<br/>≥ 15</b> |
|---------------------------------------|------------------|--------------------|----------------------------------|---------------------|
| Delafloxacin                          |                  | R<br>≤ 19          | I<br>20-22                       | S<br>≥ 23           |
| Ceftazidime                           |                  | R<br>≤ 14          | I<br>15-17                       | S<br>≥ 18           |
| Cefepime                              |                  | R<br>≤ 14          | I<br>15-17                       | S<br>≥ 18           |
| Meropenem*                            |                  | R<br>≤ 15          | I<br>16-18                       | S<br>≥ 19           |
| Imipenem*                             |                  | R<br>≤ 15          | I<br>16-18                       | S<br>≥ 19           |
| Pipercillin-Tazobactam                |                  | R<br>≤ 14          | I<br>15-20                       | S<br>≥ 21           |
| Ceftolozane-Tazobactam                |                  | R<br>≤ 16          | I<br>17-20                       | S<br>≥ 21           |
| Ceftazidime-Avibactam                 |                  | R<br>≤ 17          | I<br>-                           | S<br>≥ 18           |
| Ciprofloxacin                         |                  | R<br>≤ 15          | I<br>16-20                       | S<br>≥ 21           |
| Levofloxacin                          |                  | R<br>≤ 13          | I<br>14-16                       | S<br>≥ 17           |
| Gentamicin                            |                  | R<br>≤ 12          | I<br>13-14                       | S<br>≥ 15           |
| Amikacin                              |                  | R<br>≤ 14          | I<br>15-16                       | S<br>≥ 17           |
| Trimethoprim-sulfamethoxazole         |                  | R<br>≥ 16          | I<br>11-15                       | S<br>≤ 10           |
| Colistin                              |                  | R<br>≤ 10          | S<br>≥ 11                        |                     |
| <b>confirm resistance with E-test</b> |                  |                    |                                  |                     |

\*Perform carbapenemase inactivation if resistant.

## Zone of inhibition (mm) and phenotypic resistance determination for clinical *Pseudomonas aeruginosa* isolates

| Antibiotics                         | <i>Pseudomonas aeruginosa</i> strains names |                |         |                |          |                        |          |                        |         |                        |         |                        |
|-------------------------------------|---------------------------------------------|----------------|---------|----------------|----------|------------------------|----------|------------------------|---------|------------------------|---------|------------------------|
|                                     | PA_64                                       |                | PA_65   |                | PA_88    |                        | PA_107   |                        | PA_141  |                        | PA_152  |                        |
|                                     | ZOI (m)                                     | Interpretation | ZOI (m) | Interpretation | ZOI (m)  | Interpretation         | ZOI (m)  | Interpretation         | ZOI (m) | Interpretation         | ZOI (m) | Interpretation         |
| Delafloxacin                        | 12                                          | Resistant      | 16      | Resistant      | 16       | Resistant              | 11       | Resistant              | 11      | Resistant              | 26      | Sensitive              |
| Ciprofloxacin                       | 11                                          | Resistant      | 38      | Sensitive      | 22       | Sensitive Intermediate | 35       | Sensitive              | 13      | Resistant              | 11      | Resistant              |
| Levofloxacin                        | 30                                          | Sensitive      | 30      | sensitive      | 14       |                        | 28       | Sensitive              | 10      | Resistant              | 16      | Resistant              |
| Ceftazidime                         | 8                                           | Resistant      | 8       | Resistant      | 6        | Resistant              | 10       | Resistant              | 17      | Resistant              | 28      | Sensitive              |
| Cefepime                            | 30                                          | Sensitive      | 13      | Resistant      | 6        | Resistant              | 11       | Resistant Intermediate | 12      | Resistant              | 36      | Sensitive              |
| Meropenem                           | 38                                          | Sensitive      | 33      | Sensitive      | 12       | Resistant              | 13       |                        | 18      | Resistant Intermediate | 31      | Sensitive              |
| Imipenem                            | 26                                          | Sensitive      | 29      | Sensitive      | 10       | Resistant              | 18       | Sensitive              | 26      |                        | 27      | Sensitive Intermediate |
| Aztreonam                           | 30                                          | Sensitive      | 28      | Sensitive      | 6        | Resistant              | 16       | Resistant              | 14      | Resistant              | 17      |                        |
| piperacillin-tazobactam             | 30                                          | Sensitive      | 32      | Sensitive      | 6        | Resistant              | 30       | Sensitive              | 6       | Resistant              | 30      | Sensitive              |
| Ceftolozane/Tazobactam              | 32                                          | Sensitive      | 30      | Sensitive      | 6        | Resistant              | 30       | Sensitive              | 6       | Resistant              | 29      | Sensitive              |
| Ceftazidime/Avibactam               | 30                                          | Sensitive      | 29      | Sensitive      | 6        | Resistant              | 25       | Sensitive              | 6       | Resistant              | 28      | Sensitive              |
| Trimethoprim/Sulfamethoxazole       | 6                                           | Resistant      | 6       | Resistant      | 6        | Resistant              | 6        | Resistant              | 6       | Resistant              | 6       | Resistant              |
| Gentamicin                          | 12                                          | Resistant      | 12      | Resistant      | 6        | Resistant              | 20       | Sensitive              | 23      | Sensitive              | 17      | Sensitive              |
| Amikacin                            | 12                                          | Resistant      | 22      | Sensitive      | 6        | Sensitive              | 24       | Sensitive              | 26      | Sensitive              | 20      | Sensitive              |
| Colistin                            | 14                                          | Sensitive      | 13      | Sensitive      | 14       | Sensitive              | 15       | Sensitive              | 14      | Sensitive              | 14      | Sensitive              |
| Antibiotic Resistivity Profile      | MDR                                         |                | MDR     |                | XDR      |                        | MDR      |                        | XDR     |                        | MDR     |                        |
| Carbapenem Inactivation Assay (CIA) | NA                                          |                | NA      |                | Positive |                        | Negative |                        | NA      |                        | NA      |                        |

NA indicates that no interpretive criteria have been established. ATCC 27853 disk diffusion values were used as QC ranges provided by the CLSI.

**Supplementary Table S7.** List of all reference strains used in the study along with their geographic region of isolation.

| <b>Strain no.</b> | <b>Origin</b> |
|-------------------|---------------|
| AR 0354           | USA           |
| AR 0357           | USA           |
| FDAARGOS 501      | USA           |
| E6130952          | Canada        |
| NCGM2.S1          | Japan         |
| NCGM1984          | Japan         |
| NCGM1900          | Japan         |
| PB367             | USA           |
| PB350             | USA           |
| 24Pae112          | Colombia      |
| MRSN12280         | USA           |
| paerg009          | Switzerland   |
| paerg005          | Switzerland   |
| BAMCPA07-48       | USA           |
| Ocean-1175        | Japan         |
| Ocean-1155        | Japan         |
| DN1               | China         |
| PPF-1             | Canada        |
| AR 455            | USA           |
| AR 0095           | USA           |
| PA D22            | Singapore     |
| PA D9             | Canada        |
| PA D16            | Singapore     |
| PA D5             | Singapore     |
| PA D2             | Singapore     |
| PA D1             | Canada        |
| PA D25            | Singapore     |
| PA D21            | Singapore     |
| H25883            | Switzerland   |
| PASGNDM699        | Singapore     |
| B10W              | USA           |
| AR 0353           | USA           |
| Pa58              | Mexico        |
| PASGNDM345        | Singapore     |
| UCBPP-PA14        | Brazil        |
| L10               | China         |
| H26023            | Switzerland   |
| M1608             | USA           |
| PA14Or reads      | France        |
| M37351            | USA           |
| IOMTU 133         | Japan         |
| B136 33           | Taiwan        |
| JB2               | USA           |
| Cu1510            | China         |
| VRFPA04           | India         |
| MTB-1             | Japan         |
| SP4527            | India         |
| BA15561           | India         |
| SP4528            | India         |
| SP2230            | India         |
| B41226            | USA           |
| NCGM257           | Japan         |
| B17932            | USA           |
| B14130            | USA           |
| SP4371            | India         |

|                          |             |
|--------------------------|-------------|
| PB369                    | USA         |
| PB368                    | USA         |
| NCTC9433                 | UK          |
| AR 0446                  | USA         |
| AR 0356                  | USA         |
| AR441                    | USA         |
| CR1                      | India       |
| PA7                      | India       |
| NCTC13718                | UK          |
| PA-3                     | China       |
| BA7823                   | India       |
| PA 154197                | Hing Kong   |
| H47921                   | USA         |
| PA1R                     | China       |
| PA1RG                    | China       |
| PB354                    | USA         |
| PB353                    | USA         |
| Y31                      | South Korea |
| H5708                    | USA         |
| USDA ARS USMARC 41639    | USA         |
| F23197                   | USA         |
| AR 0111                  | USA         |
| AR 0110                  | USA         |
| AR 0230                  | USA         |
| AR444                    | USA         |
| K34-7                    | Norway      |
| AR 0360                  | USA         |
| PA83                     | Germany     |
| AR 460                   | USA         |
| YL84                     | Malaysia    |
| IMP-13                   | France      |
| PABL017                  | USA         |
| Pa1207                   | USA         |
| S86968                   | USA         |
| F9670                    | USA         |
| T38079                   | USA         |
| FDAARGOS 505             | USA         |
| VA-134                   | USA         |
| PA121617                 | China       |
| H27930                   | USA         |
| F22031                   | USA         |
| T52373                   | USA         |
| PABL012                  | USA         |
| paerg000                 | Switzerland |
| W45909                   | USA         |
| HS9                      | China       |
| FA-HZ1                   | China       |
| early isolate NN2 cloneC | NA          |
| H26027                   | Switzerland |
| W36662                   | USA         |
| FDAARGOS 570             | USA         |
| W16407                   | USA         |
| PAO1                     | NA          |
| ATCC 15692               | China       |
| PAO1 Orsay               | France      |
| 12 4 4 59                | NA          |
| DK1 substr.NH57388A      | NA          |
| Nhmuc                    | Germany     |
| SCVFeb                   | Germany     |



|              |             |
|--------------|-------------|
| SCVJan       | Germany     |
| DK2          | Denmark     |
| AR 458       | USA         |
| SJTD-1       | China       |
| PA8380       | Japan       |
| RP73         | Canada      |
| F63912       | USA         |
| SCV20265     | Germany     |
| LESB58       | UK          |
| LES431       | Canada      |
| paerg010     | Switzerland |
| paerg002     | Switzerland |
| paerg011     | Switzerland |
| paerg012     | Switzerland |
| paerg004     | Switzerland |
| paerg003     | Switzerland |
| PA 150577    | Hong Kong   |
| M18          | India       |
| CCUG 70744   | Sweden      |
| AR442        | USA         |
| NCTC10332    | UK          |
| DSM 50071    | Germany     |
| carb01 63    | Netherlands |
| RIVM-EMC2982 | Netherlands |
| AR445        | USA         |
| Y82          | South Korea |
| FRD1         | USA         |
| F30658       | USA         |
| RW109        | UK          |
| F5677        | USA         |
| N15-01092    | Canada      |
| PA97         | Norway      |
| WCHPA075019  | China       |
| Pa1242       | USA         |
| PA1088       | Brazil      |
| PA7790       | Brazil      |
| PA8281       | Brazil      |
| PA11803      | Brazil      |
| Y89          | South Korea |
| Y71          | South Korea |
| PAER4 119    | Poland      |
| PAK          | USA         |
| PA 31        | Pakistan    |
| PA 89        | Pakistan    |
| X78812       | USA         |
| W60856       | USA         |
| PcyII-10     | France      |
| F9676        | China       |
