# Supplementary material for: Antimicrobial Resistance and Genomic Characterization of Six New Sequence Types in Multidrug-Resistant Pseudomonas aeruginosa Clinical Isolates from Pakistan
Source: MDPI journal article supplement (doi:10.3390/antibiotics10111386), 2021-11-12
Supplement: s1 [file s1]

**Supplementary Table S6. List of virulence genes of reference strain PAO1 used in the study.**

| <b>Genes</b>      | <b>Position in PAO1</b> | <b>Functions</b>                                                            |
|-------------------|-------------------------|-----------------------------------------------------------------------------|
| <i>alg44</i>      | 3965842-3967011         | Type 4 fimbrial precursor                                                   |
| <i>alg8</i>       | 3964275-3965759         | Alginate biosynthesis protein                                               |
| <i>algA</i>       | 3978031-3979476         | Alginate-c5-mannuronan-epimerase                                            |
| <i>algB</i>       | 6173347-6174696         | Phosphomannose isomerase/guanosine 5'-diphospho-D-mannose pyrophosphorylase |
| <i>algC</i>       | 5991168 - 5993774       | Two-component response regulator                                            |
| <i>algD</i>       | 3962825 - 3964135       | Phosphomannomutase                                                          |
| <i>algE</i>       | 3968449 - 3969921       | GDP-mannose 6-dehydrogenase                                                 |
| <i>algF</i>       | 3977184 - 3977834       | Alginate biosynthetic protein AlgK precursor                                |
| <i>algG</i>       | 3969942 - 3971573       | Alginate o-acetyltransferase                                                |
| <i>algI</i>       | 3974359 - 3975921       | Outer membrane protein                                                      |
| <i>algJ</i>       | 3975936 - 3977111       | Alginate o-acetyltransferase                                                |
| <i>algK</i>       | 3967025 - 3968452       | Alginate o-acetyltransferase                                                |
| <i>algL</i>       | 3973014 - 3974117       | Alginate biosynthesis protein                                               |
| <i>algP/algR3</i> | 5915043 - 5916101       | Poly(beta-d-mannuronate) lyase precursor                                    |
| <i>algQ</i>       | 5916918 - 5917400       | Alginate regulatory protein                                                 |
| <i>algR</i>       | 5922544 - 5923290       | Alginate regulatory protein                                                 |
| <i>algU</i>       | 831301 - 831882         | Alginate biosynthesis regulatory protein                                    |
| <i>algW</i>       | 4979834 – 4981003       | Alginate biosynthesis protein                                               |
| <i>algX</i>       | 3971586 - 3973010       | AlgW protein [Alginate regulation (CVF523)]                                 |
| <i>algZ/amrZ</i>  | 3791347 – 3791673       | Alginate and motility regulator Z                                           |
| <i>aprA</i>       | 1355631 - 1357070       | Alkaline metalloproteinase precursor                                        |
| <i>exoS</i>       | 4303141 – 4304502       | exoenzyme S/ Pathogenesis                                                   |
| <i>exoT</i>       | 58786 - 60159           | Type III secretion system effector                                          |
| <i>exoU*</i>      | 4580957 - 4583020       | Type III secretion system effector                                          |
| <i>exoY</i>       | 2410344 – 2411480       | Type III secretion system effector                                          |

| <b>Genes</b>     | <b>Position in PAO1</b> | <b>Functions</b>                                                               |
|------------------|-------------------------|--------------------------------------------------------------------------------|
| <i>exsA</i>      | 1857273 - 1858109       | Type III secretion system effector                                             |
| <i>exsB</i>      | 1856562 - 1856975       | Type III secretion system regulatory protein                                   |
| <i>exsC</i>      | 1855862 - 1856299       | Type III secretion system pilin                                                |
| <i>exsD</i>      | 1858207 - 1859037       | Type III secretion system regulatory protein                                   |
| <i>exsE</i>      | 1856308 - 1856553       | Type III secretion system regulatory protein                                   |
| <i>fleI/flag</i> |                         | FimX [type IV pili (AI097)]                                                    |
| <i>fleN</i>      | 1583956 – 1584798       | Flagellar protein FlaG [Deoxyhexose linking sugar]                             |
| <i>fleQ</i>      | 1187587 - 1189059       | Flagellar protein                                                              |
| <i>fleR</i>      | 1190385 - 1191806       | Transcriptional regulator                                                      |
| <i>fleS</i>      | 1189172 – 1190380       | Two-component response regulator                                               |
| <i>flgA</i>      |                         | Two-component sensor<br>[Deoxyhexose linking sugar, 209 linking sugar, island] |
| <i>flgB</i>      | 1164275 - 1164682       | Flagellar basal body P-ring biosynthesis protein linking Da                    |
| <i>flgC</i>      | 1164688 – 1165128       | Flagellar basal body rod protein<br>Virulence genes Functions                  |
| <i>flgD</i>      | 1165141 - 1165854       | Flagellar basal-body rod protein                                               |
| <i>flgE</i>      | 1165882 – 1167270       | Flagellar basal-body rod modification protein                                  |
| <i>flgF</i>      | 1167488 - 1168237       | Flagellar hook protein                                                         |
| <i>flgG</i>      | 1168284 - 1169069       | Flagellar basal-body rod protein                                               |
| <i>flgH</i>      | 1169115 - 1169810       | Flagellar basal-body rod protein                                               |
| <i>flgI</i>      | 1169822 – 1170931       | Flagellar L-ring protein precursor                                             |
| <i>flgJ</i>      | 1170942 - 1172144       | Flagellar P-ring protein precursor                                             |
| <i>flgK</i>      | 1172163 – 1174214       | Flagellar rod assembly protein/muramidase                                      |
| <i>flgL</i>      | 1174240 – 1175559       | Flagellar hook-associated protein 1                                            |
| <i>flgM</i>      | 3762804 - 3763127       | Flagellar hook-associated protein 3                                            |

| <b>Genes</b> | <b>Position in PAO1</b> | <b>Functions</b>                                             |
|--------------|-------------------------|--------------------------------------------------------------|
| <i>flhA</i>  | 1580321 - 1582444       | Flagella synthesis protein                                   |
| <i>flhB</i>  | 1576338 – 1577474       | Flagellar biosynthesis protein                               |
| <i>flhF</i>  | 1582528 - 1583817       | Flagellar biosynthetic protein                               |
| <i>fliA</i>  | 1584795 - 1585538       | Flagellar biosynthesis protein                               |
| <i>fliC</i>  | 1183058 - 1184524       | B-type flagellin                                             |
| <i>fliD</i>  | 1185060 – 1186484       | Flagellar capping protein FliD                               |
| <i>fliE</i>  | 1192053 - 1192382       | Flagellar hook-basal body complex protein                    |
| <i>fliF</i>  | 1192405 - 1194201       | Flagellar M-ring protein                                     |
| <i>fliG</i>  | 1194207 - 1195223       | Flagellar motor switch protein G                             |
| <i>fliH</i>  | 1195225 – 1196031       | Probable Flagellar assembly protein                          |
| <i>fliI</i>  | 1196021 - 1197376       | Flagellum-specific ATP synthase                              |
| <i>fliJ</i>  | 1197390 - 1197833       | Flagellar protein                                            |
| <i>fliL</i>  | 1572023 – 1572544       | Flagellar hook-length control protein                        |
| <i>fliM</i>  | 1572552 – 1573523       | Flagellar motor switch protein fliM                          |
| <i>fliN</i>  | 1573551 - 1574024       | Flagellar motor switch protein fliN                          |
| <i>fliO</i>  | 1574026 – 1574478       | Flagellar protein                                            |
| <i>fliP</i>  | 1574475 - 1575242       | Flagellar biosynthetic protein                               |
| <i>fliQ</i>  | 1575290 - 1575559       | Flagellar biosynthetic protein                               |
| <i>fliR</i>  | 1575559 – 1576335       | Flagellar biosynthetic protein                               |
| <i>fliS</i>  | 1186606 – 1186986       | Flagellar biosynthetic protein                               |
| <i>gacA</i>  | 2925788 – 2926432       | Response regulator                                           |
| <i>gacS</i>  | 1012975 - 1015752       | Sensor/response regulator hybrid                             |
| <i>lasA</i>  | 2032695 - 2033951       | LasA protease precursor                                      |
| <i>lasB</i>  | 4168987 - 4170483       | Elastase                                                     |
| <i>lasI</i>  | 1559254 - 1559859       | Autoinducer synthesis protein                                |
| <i>lasR</i>  | 1558171 - 1558890       | Transcriptional regulator                                    |
| <i>lepA</i>  | 5082443 – 5086696       | Pseudomonas aeruginosa -derived large extracellular protease |
| <i>motA</i>  | 5559021 – 5559872       | Chemotaxis protein                                           |
| <i>motB</i>  | 5557958 - 5559001       | Chemotaxis protein                                           |

| <b>Genes</b> | <b>Position in PAO1</b> | <b>Functions</b>                                                                                                          |
|--------------|-------------------------|---------------------------------------------------------------------------------------------------------------------------|
| <i>motC</i>  | 1590533 - 1591273       | Chemotaxis protein                                                                                                        |
| <i>motD</i>  | 1591286 – 1592176       | Chemotaxis protein                                                                                                        |
| <i>motY</i>  | 3945997 - 3946962       | Chemotaxis protein                                                                                                        |
| <i>mucA</i>  | 831914 – 832498         | Anti-sigma factor mucA                                                                                                    |
| <i>mucB</i>  | 832507 - 833457         | Negative regulator for alginate biosynthesis                                                                              |
| <i>mucC</i>  | 833454 - 833909         | Positive regulator for alginate biosynthesis                                                                              |
| <i>mucD</i>  | 833949 – 835373         | Serine protease MucD precursor                                                                                            |
| <i>mucE</i>  | 4514079 – 4514348       | Alginate regulation                                                                                                       |
| <i>mucP</i>  | 4087526 – 4088878       | Alginate regulation                                                                                                       |
| <i>mvfR</i>  | 1086097 - 1087095       | Transcriptional regulator                                                                                                 |
| <i>ndVB</i>  | 1260557 - 1263166       | Required for the synthesis of periplasmic glucans, and involved in biofilm-specific resistance to a subset of antibiotics |
| <i>pasP</i>  | 470662 – 471237         | Small protease                                                                                                            |
| <i>pcr1</i>  | 1848074 - 1848352       | Transcriptional regulator                                                                                                 |
| <i>pcr2</i>  | 1848339 - 1848710       | Type III secretion system protein                                                                                         |
| <i>pcr3</i>  | 1848707 - 1849072       | Type III secretion system protein                                                                                         |
| <i>pcr4</i>  | 1849077 - 1849406       | Type III secretion system protein                                                                                         |
| <i>pcrD</i>  | 1849403 – 1851523       | Type III secretion system protein                                                                                         |
| <i>pcrG</i>  | 1851991 – 1852278       | Type III secretion system protein regulator                                                                               |
| <i>pcrH</i>  | 1853181 - 1853684       | Type III secretion system cytoplasmic regulator                                                                           |
| <i>pcrR</i>  | 1851520 – 1851954       | Type III secretion system regulatory protein                                                                              |
| <i>pcrV</i>  | 1852288 - 1853172       | Type III secretion system regulatory protein                                                                              |
| <i>phnA</i>  | 1083972 - 1085564       | Anthranilate synthase component I                                                                                         |
| <i>phnB</i>  | 1085542 – 1086144       | Anthranilate synthase component II                                                                                        |

| <b>Genes</b> | <b>Position in PAO1</b> | <b>Functions</b>                                                   |
|--------------|-------------------------|--------------------------------------------------------------------|
| <i>phzM</i>  | 4712095 – 4713099       | Phenazine-modifying enzyme                                         |
| <i>phzS</i>  | 4720301 - 4721509       | Phenazine-specific methyltransferase                               |
| <i>plcB</i>  | 27646 – 28632           | Phospholipase C,                                                   |
| <i>plcH</i>  | 919258 – 921450         | Hemolytic phospholipase C precursor                                |
| <i>plcN</i>  | 3720681 - 3722759       | Non-hemolytic phospholipase C precursor                            |
| <i>pldA</i>  | 3902663 – 3905962       | Phospholipase D                                                    |
| <i>popB</i>  | 1853665 – 1854837       | Type III secretion system hydrophobic translocator, pore           |
| <i>popD</i>  | 1854849 - 1855736       | Type III secretion system hydrophobic translocator, pore           |
| <i>popN</i>  | 1847227 – 1848093       | Type III secretion system outer membrane protein                   |
| <i>pqsA</i>  | 1078462 - 1080015       | Pseudomonas quinolone signal response (probable coenzyme A ligase) |
| <i>pqsB</i>  | 1080009 - 1080860       | Pseudomonas quinolone signal response                              |
| <i>pqsC</i>  | 1080853 - 1081899       | Quinolone signal biosynthesis                                      |
| <i>pqsD</i>  | 1081942 – 1082955       | Quinolone signal biosynthesis                                      |
| <i>pqsE</i>  | 1082949 – 1083854       | Quinolone signal response                                          |
| <i>pqsH</i>  | 2926773 – 2927921       | FAD-dependent monooxygenase                                        |
| <i>pqsL</i>  | 4687652 - 4688848       | Putative monooxygenase                                             |
| <i>pscB</i>  | 1859071 – 1859493       | Type III export apparatus protein                                  |
| <i>pscC</i>  | 1859493 – 1861295       | Type III secretion system protein                                  |
| <i>pscD</i>  | 1861297 - 1862595       | Type III secretion system basal body protein                       |
| <i>pscE</i>  | 1862558 - 1862761       | Type III export protein                                            |
| <i>pscF</i>  | 1862764 - 1863021       | Type III secretion system needle filament protein                  |
| <i>pscG</i>  | 1863024 – 1863371       | Type III secretion system chaperone                                |
| <i>pscH</i>  | 1863368 - 1863799       | Type III secretion system protein                                  |

| <b>Genes</b> | <b>Position in PAO1</b> | <b>Functions</b>                            |
|--------------|-------------------------|---------------------------------------------|
| <i>pscI</i>  | 1863799 - 1864137       | Type III secretion system inner rod protein |
| <i>pscJ</i>  | 1864134 – 1864880       | Type III secretion system inner MS ring IV  |
| <i>pscK</i>  | 1864889 - 1865515       | Type III export protein                     |
| <i>pscL</i>  | 1865494 – 1866138       | Type III secretion system protein           |
| <i>pscN</i>  | 1845714 - 1847036       | Type III secretion system ATPase            |
| <i>pscO</i>  | 1845241 – 1845717       | Type III secretion system protein           |
| <i>pscP</i>  | 1844144 - 1845253       | Type III translocation protein              |
| <i>pscQ</i>  | 1843218 - 1844147       | Type III translocation protein              |
| <i>pscR</i>  | 1842568 - 1843221       | Type III translocation protein              |
| <i>pscS</i>  | 1842299 – 1842565       | Probable type III translocation protein     |
| <i>pscT</i>  | 1841514 – 1842302       | Type III secretion system protein           |
| <i>pscU</i>  | 1840468 – 1841517       | Translocation protein in type III secretion |
| <i>pvdE</i>  | 2653435 – 2655084       | Pyoverdine biosynthesis protein             |
| <i>rhII</i>  | 3889139 – 3889744       | Autoinducer synthesis protein               |
| <i>rhIR</i>  | 3889925 - 3890650       | Transcriptional regulator                   |
| <i>toxA</i>  | 1240584 - 1242500       | Exotoxin A precursor                        |
| <i>tssC1</i> | 101778 - 103274         | Type VI secretion protein                   |
| <i>vgrG3</i> | 2624204 – 2626210       | Type VI secretion complex protein           |
